# Supplementary material for: A Crystalline Nitrogen Chain Radical Anion
Source: Research Square preprint supplement (doi:10.21203/rs.3.rs-6055289/v1), 2025-02-27

## checkCIF/PLATON report

Structure factors have been supplied for datablock(s) Imm28

THIS REPORT IS FOR GUIDANCE ONLY. IF USED AS PART OF A REVIEW PROCEDURE FOR PUBLICATION, IT SHOULD NOT REPLACE THE EXPERTISE OF AN EXPERIENCED CRYSTALLOGRAPHIC REFEREE.

No syntax errors found.      CIF dictionary      Interpreting this report

### Datablock: Imm28

---

|                        |                                             |                                                              |
|------------------------|---------------------------------------------|--------------------------------------------------------------|
| Bond precision:        | C-C = 0.0060 A                              | Wavelength=1.54184                                           |
| Cell:                  | a=25.6890 (5)<br>alpha=90                   | b=8.1881 (2)<br>beta=98.540 (2)<br>c=20.2875 (5)<br>gamma=90 |
| Temperature:           | 100 K                                       |                                                              |
|                        | Calculated                                  | Reported                                                     |
| Volume                 | 4220.04 (17)                                | 4220.04 (17)                                                 |
| Space group            | C 2/c                                       | C 1 2/c 1                                                    |
| Hall group             | -C 2yc                                      | -C 2yc                                                       |
| Moiety formula         | C18 H36 K N2 O6, C12 H8 Br2 N4, 2 (C4 H8 O) | C12 H8 Br2 N4, C18 H36 K N2 O6, 2 (C4 H8 O)                  |
| Sum formula            | C38 H60 Br2 K N6 O8                         | C38 H60 Br2 K N6 O8                                          |
| Mr                     | 927.82                                      | 927.84                                                       |
| Dx, g cm <sup>-3</sup> | 1.460                                       | 1.460                                                        |
| Z                      | 4                                           | 4                                                            |
| Mu (mm <sup>-1</sup> ) | 3.784                                       | 3.784                                                        |
| F000                   | 1932.0                                      | 1932.0                                                       |
| F000'                  | 1932.95                                     |                                                              |
| h, k, lmax             | 32, 10, 25                                  | 32, 10, 25                                                   |
| Nref                   | 4434                                        | 4384                                                         |
| Tmin, Tmax             | 0.695, 0.815                                | 0.166, 1.000                                                 |
| Tmin'                  | 0.377                                       |                                                              |

Correction method= # Reported T Limits: Tmin=0.166 Tmax=1.000  
AbsCorr = MULTI-SCAN

Data completeness= 0.989      Theta(max)= 76.394

R(reflections)= 0.0712 ( 4093)

wR2(reflections)=  
0.1906 ( 4384)

S = 1.146

Npar= 344

---

The following ALERTS were generated. Each ALERT has the format

**test-name\_ALERT\_alert-type\_alert-level.**

Click on the hyperlinks for more details of the test.

---

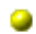

### Alert level C

|                   |                                                  |    |              |
|-------------------|--------------------------------------------------|----|--------------|
| PLAT042_ALERT_1_C | Calc. and Reported MoietyFormula Strings Differ  |    | Please Check |
|                   | Calc: C18 H36 K N2 O6, C12 H8 Br2 N4, 2(C4 H8 O) |    |              |
|                   | Rep.: C12 H8 Br2 N4, C18 H36 K N2 O6, 2(C4 H8 O) |    |              |
| PLAT260_ALERT_2_C | Large Average Ueq of Residue Including           | 04 | 0.145 Check  |
| PLAT260_ALERT_2_C | Large Average Ueq of Residue Including           | 05 | 0.145 Check  |
| PLAT906_ALERT_3_C | Large K Value in the Analysis of Variance .....  |    | 5.790 Check  |
| PLAT977_ALERT_2_C | Check Negative Difference Density on H1HA        | .  | -0.38 eA-3   |

---

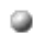

### Alert level G

|                   |                                                            |        |             |
|-------------------|------------------------------------------------------------|--------|-------------|
| PLAT002_ALERT_2_G | Number of Distance or Angle Restraints on AtSite           |        | 24 Note     |
| PLAT003_ALERT_2_G | Number of Uiso or U(i,j) Restrained non-H-Atoms            |        | 28 Report   |
| PLAT083_ALERT_2_G | SHELXL Second Parameter in WGHT Unusually Large            |        | 21.23 Why ? |
| PLAT168_ALERT_4_G | The CIF-Embedded .res File Contains EXYZ Records           |        | 1 Report    |
| PLAT171_ALERT_4_G | The CIF-Embedded .res File Contains EADP Records           |        | 1 Report    |
| PLAT172_ALERT_4_G | The CIF-Embedded .res File Contains DFIX Records           |        | 6 Report    |
| PLAT173_ALERT_4_G | The CIF-Embedded .res File Contains DANG Records           |        | 2 Report    |
| PLAT176_ALERT_4_G | The CIF-Embedded .res File Contains SADI Records           |        | 13 Report   |
| PLAT178_ALERT_4_G | The CIF-Embedded .res File Contains SIMU Records           |        | 4 Report    |
| PLAT187_ALERT_4_G | The CIF-Embedded .res File Contains RIGU Records           |        | 4 Report    |
| PLAT191_ALERT_3_G | A Non-default SADI Restraint Value has been used           | 0.0400 | Report      |
| PLAT191_ALERT_3_G | A Non-default SADI Restraint Value has been used           | 0.0400 | Report      |
| PLAT191_ALERT_3_G | A Non-default SADI Restraint Value has been used           | 0.0400 | Report      |
| PLAT191_ALERT_3_G | A Non-default SADI Restraint Value has been used           | 0.0400 | Report      |
| PLAT302_ALERT_4_G | Anion/Solvent/Minor-Residue Disorder (Resd 2)              | 100%   | Note        |
| PLAT302_ALERT_4_G | Anion/Solvent/Minor-Residue Disorder (Resd 3)              | 100%   | Note        |
| PLAT302_ALERT_4_G | Anion/Solvent/Minor-Residue Disorder (Resd 4)              | 100%   | Note        |
| PLAT302_ALERT_4_G | Anion/Solvent/Minor-Residue Disorder (Resd 5)              | 100%   | Note        |
| PLAT304_ALERT_4_G | Non-Integer Number of Atoms in ..... (Resd 2)              | 21.42  | Check       |
| PLAT304_ALERT_4_G | Non-Integer Number of Atoms in ..... (Resd 3)              | 4.58   | Check       |
| PLAT304_ALERT_4_G | Non-Integer Number of Atoms in ..... (Resd 4)              | 8.44   | Check       |
| PLAT304_ALERT_4_G | Non-Integer Number of Atoms in ..... (Resd 5)              | 4.56   | Check       |
| PLAT398_ALERT_2_G | Deviating C-O-C Angle From 120 for O4                      | 98.2   | Degree      |
| PLAT398_ALERT_2_G | Deviating C-O-C Angle From 120 for O5                      | 104.8  | Degree      |
| PLAT411_ALERT_2_G | Short Inter H...H Contact H1DA ..H19A                      | 2.04   | Ang.        |
|                   | 1-x,-y,1-z =                                               | 5_656  | Check       |
| PLAT720_ALERT_4_G | Number of Unusual/Non-Standard Labels .....                | 16     | Note        |
|                   | H1AA H1AB H1BA H1BB H1CA H1CB H1DA H1DB                    |        |             |
|                   | H1EA H1EB H1FA H1FB H1GA H1GB H1HA H1HB                    |        |             |
| PLAT811_ALERT_5_G | No ADDSYM Analysis: Too Many Excluded Atoms ....           |        | ! Info      |
| PLAT860_ALERT_3_G | Number of Least-Squares Restraints .....                   | 622    | Note        |
| PLAT883_ALERT_1_G | Absent Datum for _atom_sites_solution_primary ..           |        | Please Do ! |
| PLAT912_ALERT_4_G | Missing # of FCF Reflections Above STh/L= 0.600            | 49     | Note        |
| PLAT969_ALERT_5_G | The 'Henn et al.' R-Factor-gap value .....                 | 5.547  | Note        |
|                   | Predicted wR2: Based on SigI**2 3.44 or SHELX Weight 16.63 |        |             |
| PLAT978_ALERT_2_G | Number C-C Bonds with Positive Residual Density.           | 0      | Info        |

---

0 **ALERT level A** = Most likely a serious problem - resolve or explain

0 **ALERT level B** = A potentially serious problem, consider carefully

5 **ALERT level C** = Check. Ensure it is not caused by an omission or oversight  
32 **ALERT level G** = General information/check it is not something unexpected

2 ALERT type 1 CIF construction/syntax error, inconsistent or missing data  
10 ALERT type 2 Indicator that the structure model may be wrong or deficient  
6 ALERT type 3 Indicator that the structure quality may be low  
17 ALERT type 4 Improvement, methodology, query or suggestion  
2 ALERT type 5 Informative message, check

---

It is advisable to attempt to resolve as many as possible of the alerts in all categories. Often the minor alerts point to easily fixed oversights, errors and omissions in your CIF or refinement strategy, so attention to these fine details can be worthwhile. In order to resolve some of the more serious problems it may be necessary to carry out additional measurements or structure refinements. However, the purpose of your study may justify the reported deviations and the more serious of these should normally be commented upon in the discussion or experimental section of a paper or in the "special\_details" fields of the CIF. checkCIF was carefully designed to identify outliers and unusual parameters, but every test has its limitations and alerts that are not important in a particular case may appear. Conversely, the absence of alerts does not guarantee there are no aspects of the results needing attention. It is up to the individual to critically assess their own results and, if necessary, seek expert advice.

### **Publication of your CIF in IUCr journals**

A basic structural check has been run on your CIF. These basic checks will be run on all CIFs submitted for publication in IUCr journals (*Acta Crystallographica*, *Journal of Applied Crystallography*, *Journal of Synchrotron Radiation*); however, if you intend to submit to *Acta Crystallographica Section C* or *E* or *IUCrData*, you should make sure that full publication checks are run on the final version of your CIF prior to submission.

### **Publication of your CIF in other journals**

Please refer to the *Notes for Authors* of the relevant journal for any special instructions relating to CIF submission.

---

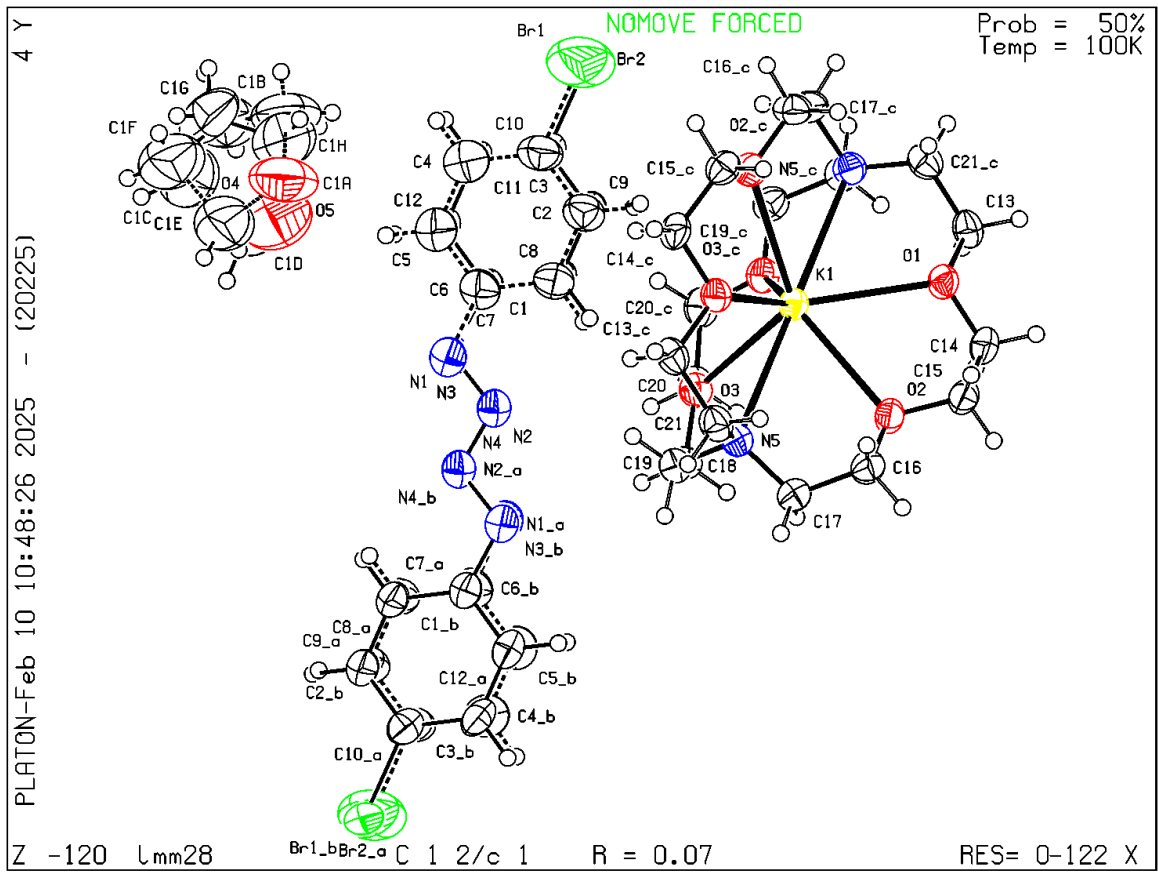

Supplement: Supplementary file 3 [file [K(crypt)][1]_cifreport.pdf › Folder 6 XRD/[K(crypt)][1]/[K(crypt)][1]_cifreport.pdf]
